# Supplementary material for: Targeting aryl hydrocarbon receptor functionally restores tolerogenic dendritic cells derived from patients with multiple sclerosis
Source: J Clin Invest. 2024 Nov 1;134(21):e178949. doi: 10.1172/JCI178949 (PMC11527446; doi:10.1172/JCI178949)
Supplement: Supporting data values [file jci-134-178949-s107.xlsx]

## Sheet: Figure 1B
Figure 1B
Classical		Intermediate		Non-Classical
HD	MS	HD	MS	HD	MS
85.6	85	12.7	9.53	2.33	9.53
86.7	79.6	7.75	9.51	5.89	11.2
95.1	84.7	2.73	24.9	2.31	7.93
91.7	69.1	3.87	9.75	4.59	5.86
93.5	93	3.1	25.5	3.46	6.59
92.8	68.6	4.03	3.75	3.33	3.27
87.5	83.2	7.57	12.8	5.17	4.63
CD45RA+ Classical		CD45RA+ Intermediate		CD45RA+ Non-classical
HD	MS	HD	MS	HD	MS
20.8	17.3	10.7	24.7	95	96
9.36	30.9	12.3	53.9	70.4	95.9
1.41	19.1	9.77	32.9	81.7	94.1
8.01	30	21	52.6	69.9	96.4
11	15.5	30	11.8	88.7	95.7
15.3	20	22.2	56.6	93.6	96.4
11.7	36.3	21.1	11.6	93.5	95.7
CD40+ Classical		CD40+ Intermediate		CD40+ Non-classical
HD	MS	HD	MS	HD	MS
2.66	8.01	24.3	40.1	24.7	38.9
3.79	37.7	33.5	82.9	18.1	59
10.6	28.4	43.4	83.4	11.3	34.6
2.86	12.3	53.5	75.6	25	65.6
2.38	9.01	67.3	36.4	38.8	22.3
8.48	4.91	43.5	73.8	37.6	66.8
10.6	13.3	43.2	26.6	34.4	38.8

## Sheet: Figure 5C
Figure 5C
AHRR		AHR		ARNT		CYP1A1
HD tolDCs	MS tolDCs	HD tolDCs	MS tolDCs	HD tolDCs	MS tolDCs	HD tolDCs	MS tolDCs
1.253346	1.906312	9.64	9035	64.76711259	30.35487211	11.38	0.09
0.931386	1.984971	10.06833	5.526667	207.0529848	53.7126324	3.5	255
0.349683	1.509549	11.48167	8.976667	62.27248112	13.77381395	16.93	0.05498
0.719858	2.415716	10.44	9.371667	112.2462048	27.67521954	1.26745	0.5724
0.155946	2.182201	12.64667	8.84	379.8056661	42.82920095	38.81	35

## Sheet: Figure 6A
Figure 6A
AHRR		AHR		ARNT		CYP1A1
MS tolDCs	MS tolDCs FICZ	MS tolDCs	MS tolDCs FICZ	MS tolDCs	MS tolDCs FICZ	MS tolDCs	MS tolDCs FICZ
1513	6.2234	0.580667537	10.97222559	0.375715458	2.475487011	1.640776855	1.778974354
269	9017	2.371474384	12.6826497	0.204151543	1.94897067	0.226505167	7.374018068
2.71	15.32	2.6369	5.63	1.500854669	1.873562733	1.466840881	5.161220901
42011	28.66	0.79	2.42	2.057345773	6.738609625	3.649534298	5.512521508
		1.696062722	2.816407696			0.457164833	2205
		5.771139442	6.886906974			0.69	9.25

## Sheet: Figure 6B
Figure 6B
% of CD83+CD86+ HD tolDCs	% of CD83+CD86+ of HD tolDCs + FICZ	% of CD83+CD86+ of HD tolDCs + CH223191
20.53	2.26	15.08
5.5	0.67	21.57
15.41	1.73	26.58
10.2	0.9	10.10
55.14	9.72	24.08
26.82	6.78	24.27
% of CD14+ HD tolDCs	% CD14+ of HD tolDCs + FICZ	% CD14+ of HD tolDCs + CH223191
88.08	93.38	33.73
38.64	54.37	22.15
64.43	83.58	17.4
78.44	92.94	14.21
24.89	60.96	4.67
49.33	83.23	30.38
% of HLA-DR+ HD tolDCs	% HLA-DR+ of HD tolDCs + FICZ	% HLA-DR+ of HD tolDCs + CH223191
75.95	73.74	58.65
86.67	82.86	75.66
95.27	95.79	56.28
99.04	99.15	99.05
90.68	93.8	91.65
98.8	99.83	83.77
% of CCR7+ HD tolDCs	% of CCR7+ of HD tolDCs + FICZ	% of CCR7+ + of HD tolDCs + CH223191
22.2	28	40
9.03	86.5	3.91
13.04	3.74	17.26
43.98	20.83	15.62
22.79	9.24	1.14

## Sheet: Figure 6C
Figure 6C
IL-6		IL-1b		IL-12p70		TNFa
HD tolDCs	HD tolDCs + FICZ	HD tolDCs	HD tolDCs + FICZ	HD tolDCs	HD tolDCs + FICZ	HD tolDCs	HD tolDCs + FICZ
7907.84	1177.27	189.805	189.43	11.23	9.09	923.585	837.635
1156.69	388.926	114.92	41.785	9.475	3.97	836.935	936.775
5285.66	854.197	34.595	66.11	9.825	8.835	1455.69	438.105
1087.46	380.33	69.74	88.925	10.88	9.475	92.33	114.03
2578.71	464.283	57.145	99.2	7.69	8.79	2232.66	2273.09
1015.97	318.445	37.47	41.72	10.92	11.145	723.045	705.925
921.472	450.201	47.64	73.765	13.115	11.145	1669.73	1579.97
3867.35	536.545	59.155	69.29	9.335	6.54	2563.8	1609.91
1126.01	621.836	45.6	70.38	9.475	8.62	5527.8	5454.19

## Sheet: Figure 6D
Figure 6D
	Inhibition of Proliferation
	HD tolDCs	HD tolDCs + FICZ	HD tolDCs + CH223191
	46.473	52.2822	12
	65.514	89.1589	24.5794
	54.8966	71.4943	55.7586
	64.0028	67.8218	56.7893
	71.0482	78.1895	49.9206
	78.8774	85.8198	75.1846
	70.3004	84.4477	50.6298
	42.279	50.3727	35.4633

## Sheet: Figure 6E
Figure 6E
Lactate				Glucose				pH
HD tolDC	HD tolDC + FICZ	HD tolDC + CH223191		HD tolDC	HD tolDC + FICZ	HD tolDC + CH223191		HD tolDC	HD tolDC + FICZ	HD tolDC + CH223191
33	29.29	14.06		176	182	328		6.8	6.89	7.36
33.08	17.11	7.47		185	122	322		6.82	6.95	7.41
21.01	18.86	15.06		108	108	292		6.8	6.84	7.29
23.94	20.07	11.58		260	262	339		7.18	7.19	7.57
35.24	31.32	10.63		153	166	356		6.8	6.8	7.48
32.88	29.56	12.98		190	190	339		6.8	6.81	7.48
34.45	29.51	14.64		182	178	375		6.8	6.92	7.56
12.54	24.89	23.08

## Sheet: Figure 7A
Figure 7A
AHRR		AHR		ARNT		CYP1A1
HD tolDCs	HD tolDCs DMF	HD tolDCs	HD tolDCs DMF	HD tolDCs	HD tolDCs DMF	HD tolDCs	HD tolDCs DMF
8.503111033	7.562143598	1.29	1.36	1.359849461	8.953576536	5.08	13.6
5.91409355	4.17718382	1543	0.99	7.99518238	13.63716598	3.9	6.13
10.8384792	4.633871584	4138	1102	19.6333975	14.409764	1.3	8.32
14.577468	9.965048011	2.82801324	5.26263	10.229984	5.551209198	9.65	33.26
		8.503111033	23.06214984			8.41	12.16
		26.753991	14.55057375			3.52	10.68

## Sheet: Figure 7B
Figure 7B
IL-6		IL-1b		IL-12p70		TNFa
HD tolDCs	HD tolDCs DMF	HD tolDCs	HD tolDCs DMF	HD tolDCs	HD tolDCs DMF	HD tolDCs	HD tolDCs DMF
7907.84	4421.1	189.805	140.835	11.23	8.365	923.585	307.295
1156.69	1255.44	114.92	132.87	9.475	8.915	836.935	573.825
5285.66	2493.68	34.595	101.62	9.825	8.71	1455.69	1690.42
1087.46	3648.18	69.74	126.4	10.88	9.39	92.33	151.885
2578.71	2794.33	57.145	99.68	7.69	7.11	2232.66	2244.73
1015.97	895.906	37.47	47.57	10.92	10.615	723.045	798.745
921.472	1979.39	47.64	83.405	13.115	10.57	1669.73	1816.37
3867.35	4712.34	59.155	48.075	9.335	7.11	2563.8	1770.14
1126.01	1188.41	45.6	79.835	9.475	6.87	5527.8	5953.9

## Sheet: Figure 7C
Figure 7C
% of CD83+CD86+ HD tolDCs	% of CD83+CD86+ HD tolDCs + DMF
12.32	7.99
10.36	6.94
23.84	12.57
3.7	2.47
8.54	5.73
5.17	1.7
45.34	36.33
29	19
% of CD14 HD tolDCs	% of CD14 HD tolDCs + DMF
89.85	87.5
64.87	78.48
69.16	70
90.36	89.2
50.83	56
85.83	84.6
45.34	37
49.33	47
% of HLA-DR+ HD tolDCs	% of HLA-DR+ HD tolDCs + DMF
86.67	78.26
95.27	85.09
90.78	95.12
98.82	99.5
96.12	96.63
98.8	98.2
92.54	87.45
99.04	97.67
% of CCR7+ HD tolDCs	% of CCR7+ HD tolDCs + DMF
11.08	10.19
17.07	19.946
52.08	86.08
2.67	2.03
8.02	10.25
13.04	31
10.28	17.85
43.98	52.68

[truncated: 11 more sheets: Figure 7D, Figure 8A, Figure 8B, Figure 8C, Figure 9A, Figure 9B, Figure 9C, Figure 10A, Figure 10B, Figure 10C, Figure 10D]
